# Supplementary material for: Up-regulation of miR-204 inhibits proliferation, invasion and apoptosis of gallbladder cancer cells by targeting Notch2
Source: publisher site journal article supplement (doi:10.18632/aging.202444), 2021-01-13
Supplement: Supplementary file [file aging-v13i2-202444-supplementary-material-SD1.pdf]

## SUPPLEMENTARY FIGURES

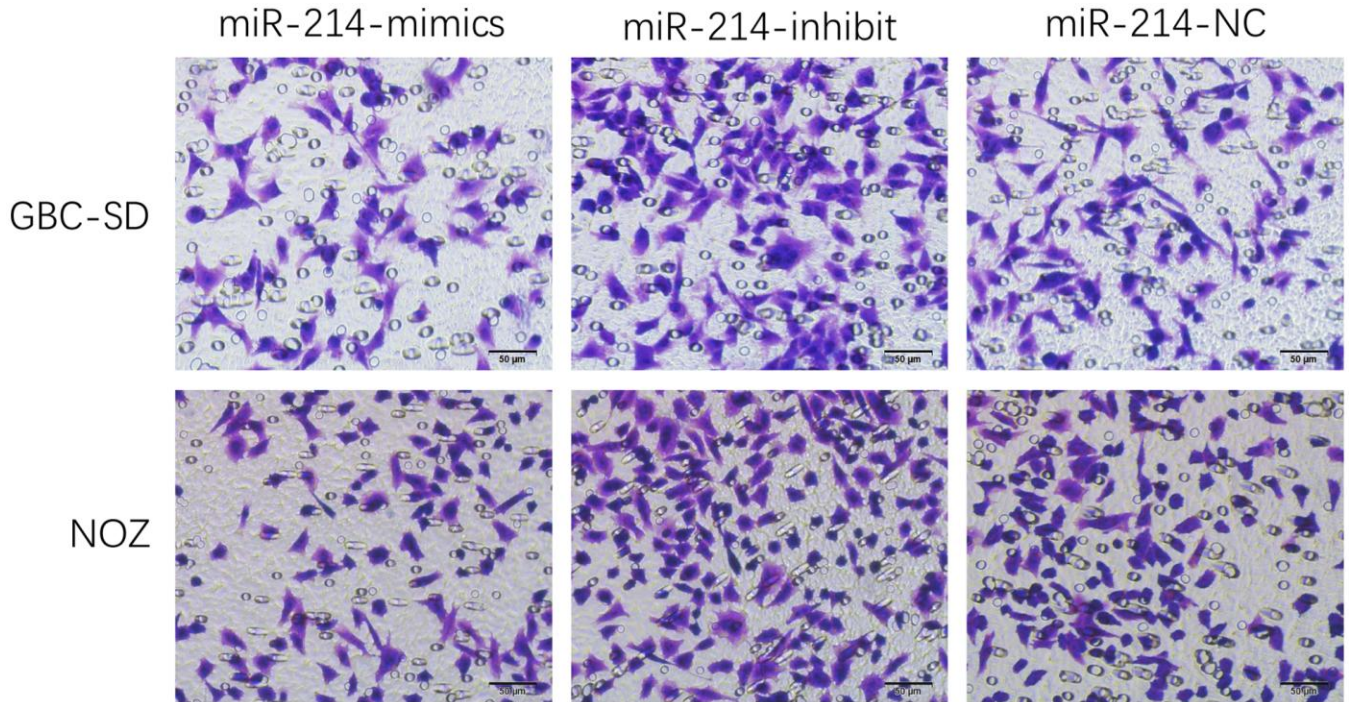

**Supplementary Figure 1. Cell invasion assay in transwell chambers by using GBC-SD or NOZ cell lines transfected with miR-214-mimics, miR-214-inhibit and miR-214-NC control.** Cells were stained with crystal violet and photographed (magnification,  $\times 100$ ). Black bars indicate 50  $\mu$ m. Compared with the control cells, cells with miR-214 knockdown (miR-214-inhibit) showed significantly enhanced migration and invasion capacity, while overexpression of miR-214 (miR-214-mimics) inhibited cell invasion.

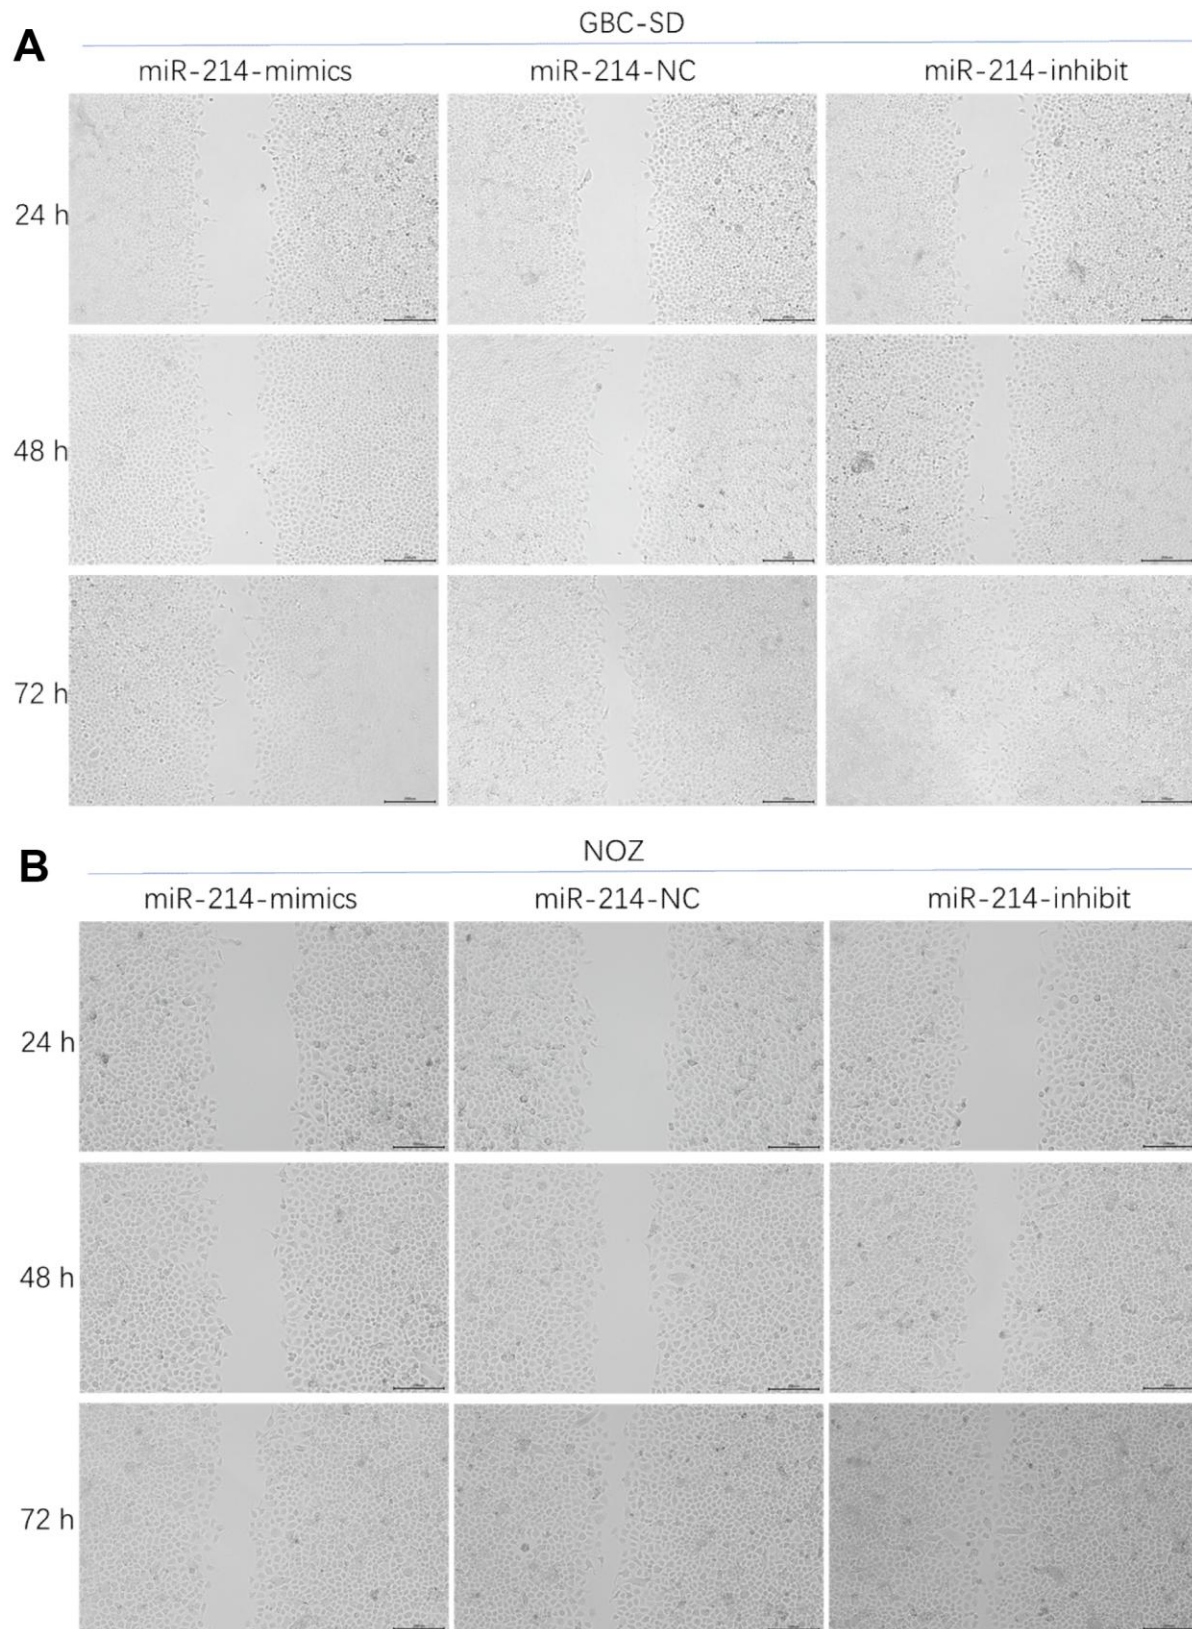

**Supplementary Figure 2.** Cell migration assay using GBC-SD (A) and NOZ (B) cell lines transfected with miR-214-mimics, miR-214-inhibit and miR-214-NC control. Scratch assay was made on confluent cells by drawing a line across the bottom of the dish. The figure shows micrographs of the extent of closure obtained after 24, 48 and 72 hours under different transfection conditions. Phase-contrast microscopy pictures were taken of the wounded area. Black bars indicated 200  $\mu$ m.

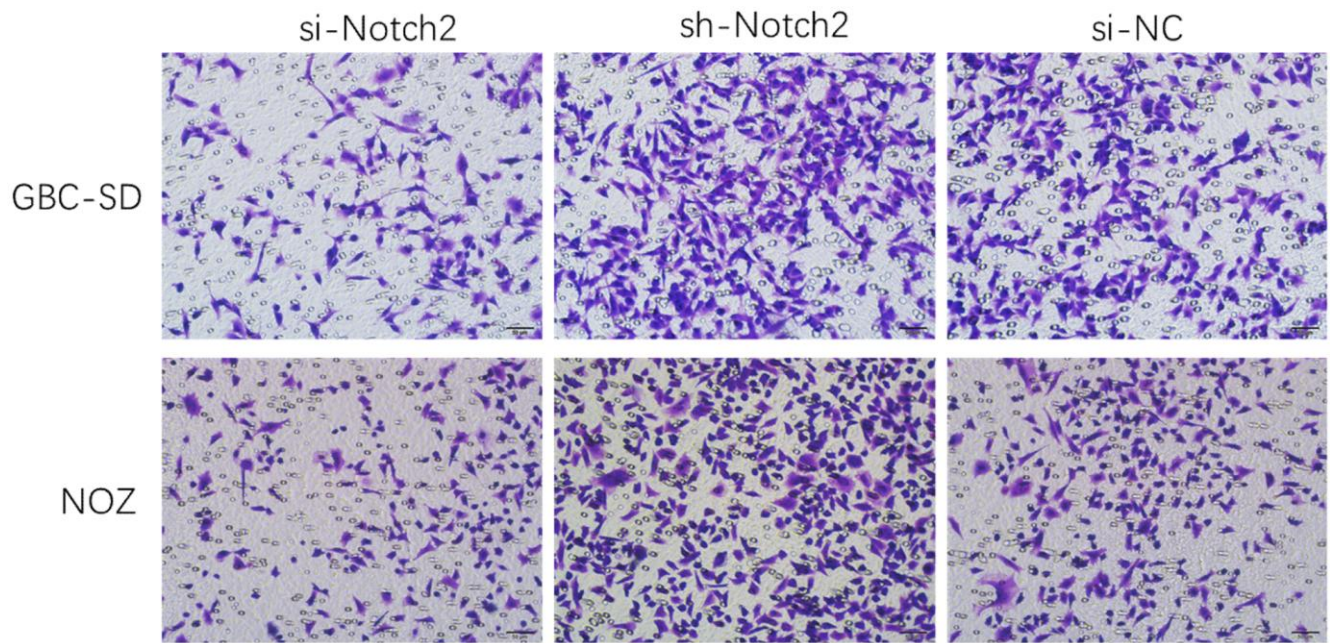

**Supplementary Figure 3. Cell invasion assay in transwell chambers by using GBC-SD or NOZ cell lines transfected with si-Notch2, sh-Notch2 and si-NC control.** Cells were stained with crystal violet and photographed (magnification,  $\times 100$ ). Black bars indicate 50  $\mu$ m. Compared with the control cells, cells with Notch2 overexpression (sh-Notch2) showed significantly enhanced migration and invasion capacity, while knockdown of Notch2 (si-Notch2) inhibited cell invasion.

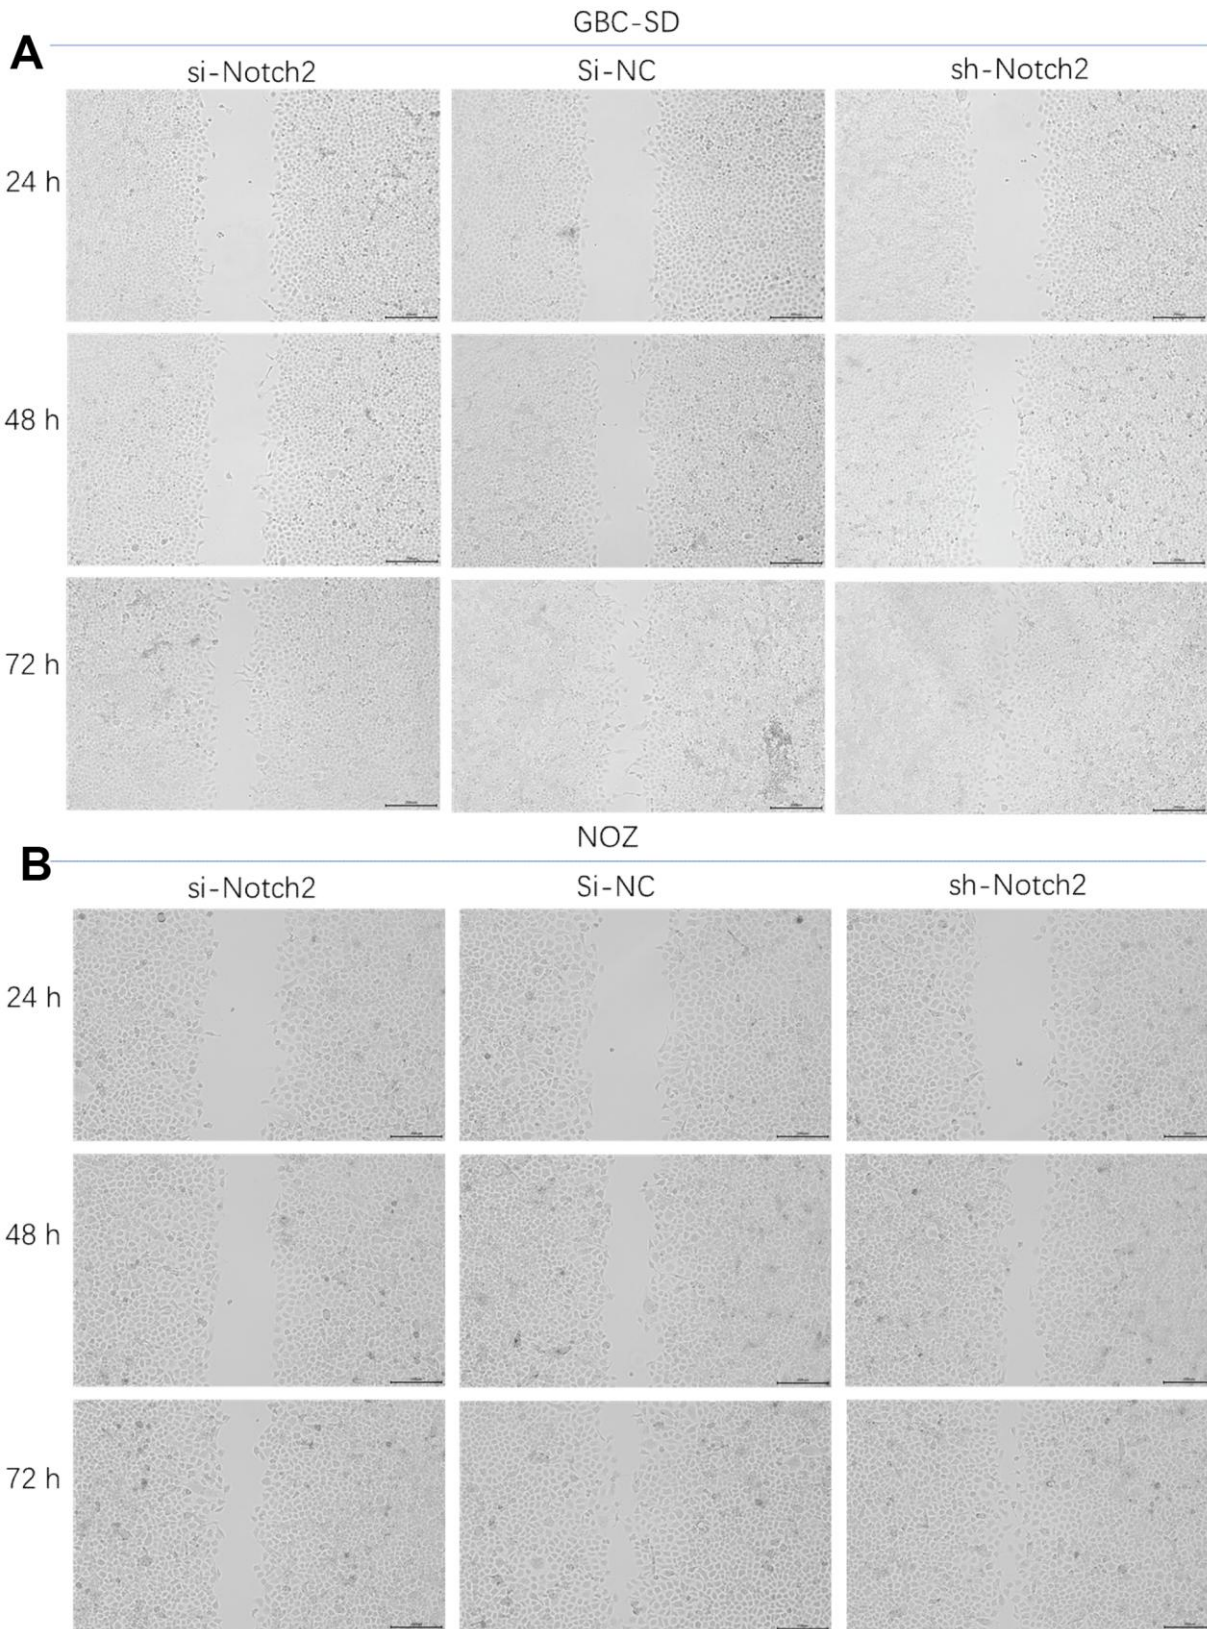

**Supplementary Figure 4.** Cell migration assay using GBS-SD (A) and NOZ (B) cell lines transfected with si-Notch2, sh-Notch2 and si-NC control. Scratch assay was made on confluent cells by drawing a line across the bottom of the dish. The figure shows micrographs of the extent of closure obtained after 24, 48 and 72 hours under different transfection conditions. Phase-contrast microscopy pictures were taken of the wounded area. Black bars indicated 200  $\mu$ m.

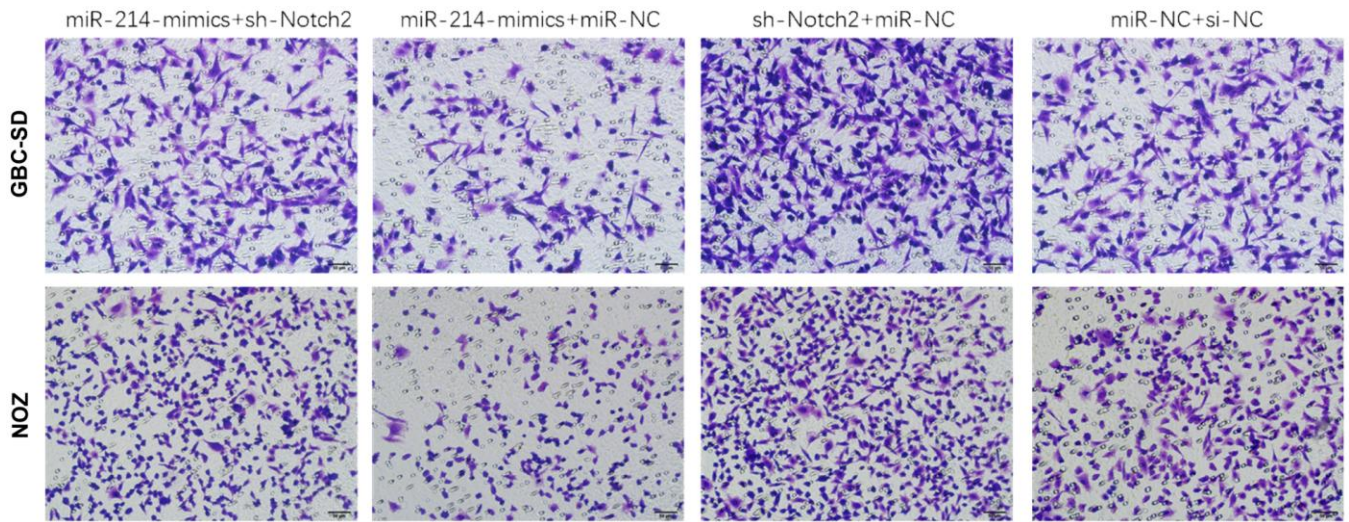

**Supplementary Figure 5. Cell invasion assay in transwell chambers by using GBC-SD or NOZ cell lines transfected with miR-214-mimics+sh-Notch2, miR-214-mimics+miR-NC, sh-Notch2+miR-NC and miR-NC+si-NC.** Cells were stained with crystal violet and photographed (magnification,  $\times 100$ ). Black bars indicate 50  $\mu$ m.

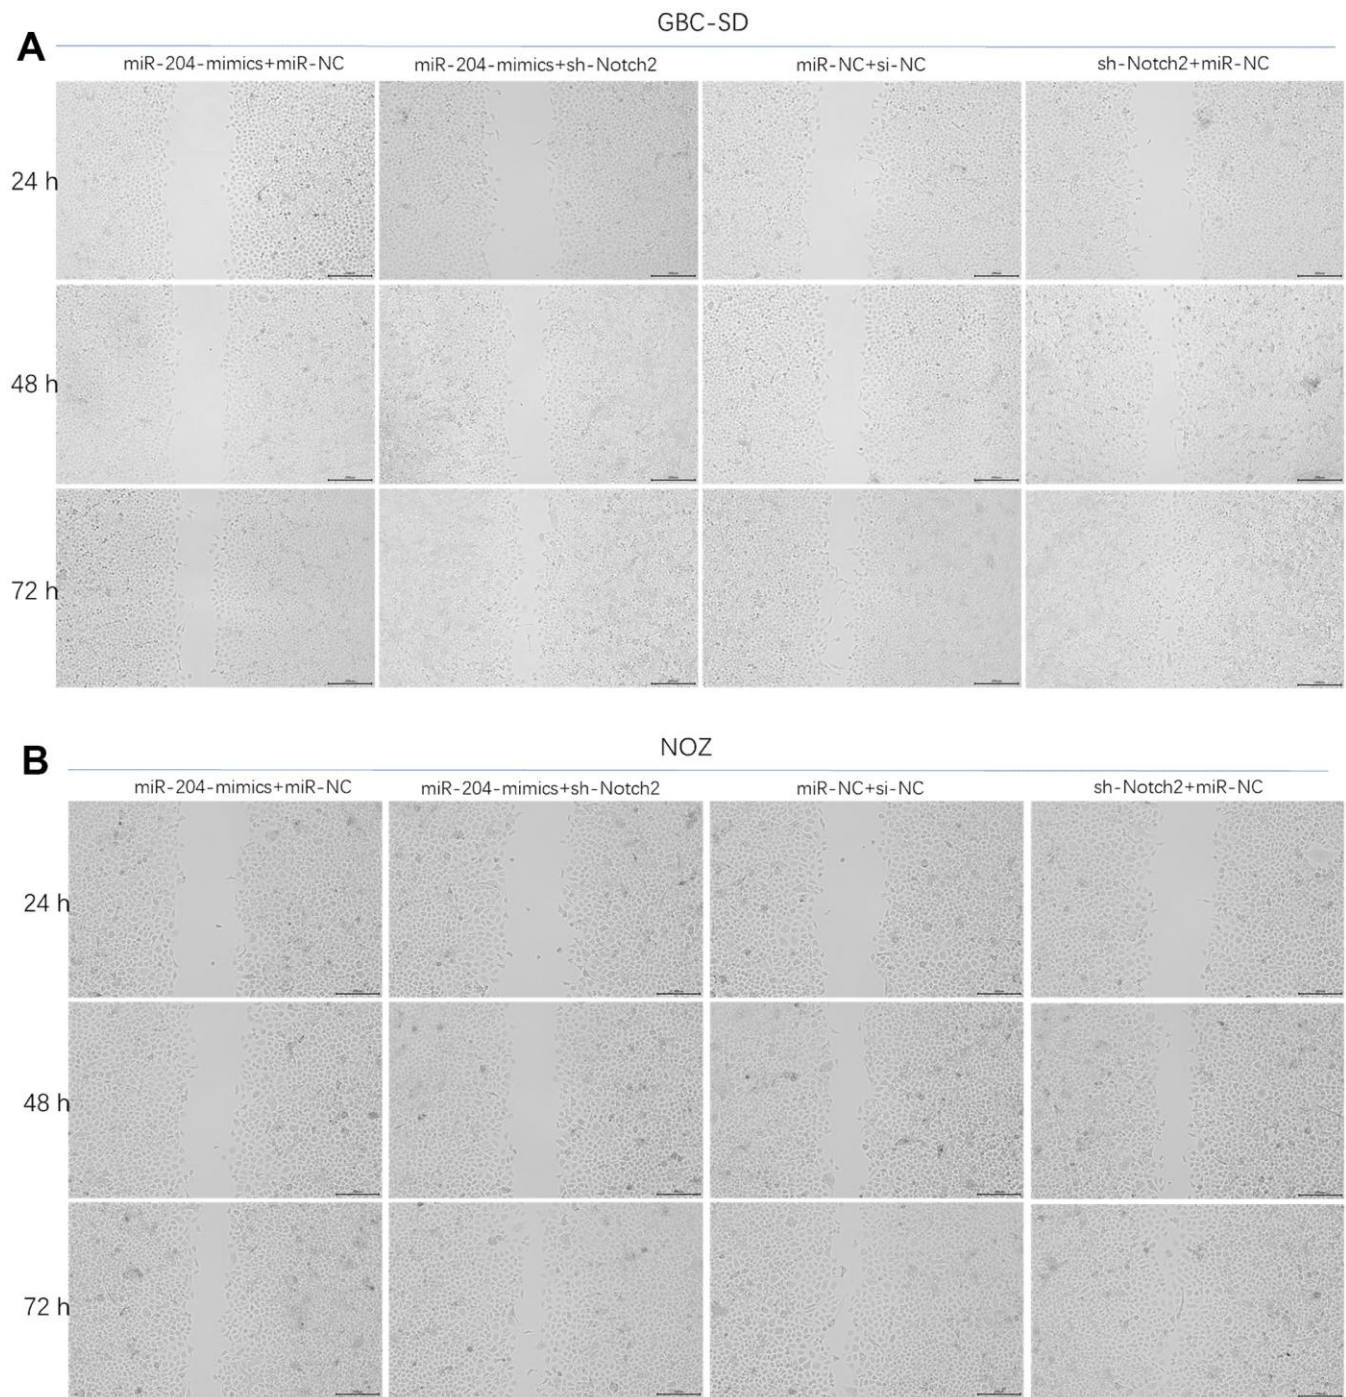

**Supplementary Figure 6.** Cell migration assay using GBS-SD (**A**) and NOZ (**B**) cell lines transfected with miR-214-mimics+sh-Notch2, miR-214-mimics+miR-NC, sh-Notch2+miR-NC and miR-NC+si-NC. Scratch assay was made on confluent cells by drawing a line across the bottom of the dish. The figure shows micrographs of the extent of closure obtained after 24, 48 and 72 hours under different transfection conditions. Phase-contrast microscopy pictures were taken of the wounded area. Black bars indicated 200  $\mu$ m.
